# Supplementary material
Source: PubMed Central journal article supplement (PMC3494407)
Supplement: NIHMS414928-supplement-01.pdf [file NIHMS414928-supplement-01.pdf]

**Supporting information - Table 4.** Multivariable HR<sup>1</sup> and 95% CI across quintiles (Q)/tertiles (T) of total sugars, *added sugars*, total fructose and sucrose intake in 255,696 men in the NIH-AARP Diet and Health Study for certain cancer sites<sup>2</sup>

|                                            | N<br>cases | Multivariable HRs (95% CI) by quintiles <sup>3</sup> or tertiles <sup>4</sup> of intake |                    |                    |                    | <i>P</i> <sub>trend</sub> |
|--------------------------------------------|------------|-----------------------------------------------------------------------------------------|--------------------|--------------------|--------------------|---------------------------|
|                                            |            | Q2/T2                                                                                   | Q3/T3              | Q4                 | Q5                 |                           |
| <b>Laryngeal cancer<sup>6</sup></b>        | 259        |                                                                                         |                    |                    |                    |                           |
| Total sugars                               |            | 0.81 (0.56 – 1.18)                                                                      | 1.08 (0.75 – 1.54) | 0.54 (0.35 – 0.85) | 0.84 (0.56 – 1.25) | 0.20                      |
| <i>Added sugars<sup>5</sup></i>            |            | 1.28 (0.86 – 1.89)                                                                      | 1.30 (0.88 – 1.93) | 1.00 (0.66 – 1.52) | 0.86 (0.55 – 1.33) | 0.14                      |
| Total fructose                             |            | 1.03 (0.72 – 1.47)                                                                      | 1.05 (0.72 – 1.51) | 0.75 (0.50 – 1.14) | 0.80 (0.53 – 1.21) | 0.14                      |
| Sucrose                                    |            | 0.91 (0.62 – 1.33)                                                                      | 1.16 (0.80 – 1.67) | 0.76 (0.50 – 1.14) | 0.81 (0.54 – 1.22) | 0.21                      |
| <b>Stomach cancer<sup>6</sup></b>          | 379        |                                                                                         |                    |                    |                    |                           |
| Total sugars                               |            | 1.17 (0.85 – 1.62)                                                                      | 1.13 (0.81 – 1.57) | 0.95 (0.67 – 1.35) | 1.18 (0.83 – 1.66) | 0.68                      |
| <i>Added sugars<sup>5</sup></i>            |            | 1.10 (0.79 – 1.53)                                                                      | 1.07 (0.77 – 1.50) | 1.02 (0.72 – 1.44) | 1.02 (0.71 – 1.46) | 0.85                      |
| Total fructose                             |            | 0.95 (0.68 – 1.31)                                                                      | 1.13 (0.82 – 1.55) | 0.84 (0.59 – 1.19) | 1.11 (0.80 – 1.55) | 0.65                      |
| Sucrose                                    |            | 0.91 (0.65 – 1.26)                                                                      | 0.84 (0.60 – 1.18) | 1.08 (0.78 – 1.49) | 1.02 (0.73 – 1.42) | 0.54                      |
| <b>Small intestinal cancer<sup>7</sup></b> | 90         |                                                                                         |                    |                    |                    |                           |
| Total sugars                               |            | 0.89 (0.52 – 1.53)                                                                      | 0.96 (0.52 – 1.77) |                    |                    | 0.90                      |
| <i>Added sugars<sup>5</sup></i>            |            | 0.95 (0.56 – 1.62)                                                                      | 1.04 (0.59 – 1.84) |                    |                    | 0.85                      |
| Total fructose                             |            | 0.94 (0.55 – 1.60)                                                                      | 1.16 (0.65 – 2.10) |                    |                    | 0.57                      |

|                                       |       |                    |                    |                    |                    |      |
|---------------------------------------|-------|--------------------|--------------------|--------------------|--------------------|------|
| Sucrose                               |       | 1.09 (0.64 – 1.86) | 1.07 (0.61 – 1.89) |                    |                    | 0.84 |
| <b>Colorectal cancer<sup>8</sup></b>  | 2,601 |                    |                    |                    |                    |      |
| Total sugars                          |       | 0.93 (0.82 – 1.05) | 0.96 (0.84 – 1.09) | 0.92 (0.81 – 1.06) | 0.95 (0.83 – 1.09) | 0.54 |
| <i>Added sugars<sup>5</sup></i>       |       | 0.90 (0.80 – 1.02) | 1.02 (0.90 – 1.15) | 0.95 (0.84 – 1.08) | 1.02 (0.89 – 1.16) | 0.55 |
| Total fructose                        |       | 0.96 (0.85 – 1.08) | 0.98 (0.87 – 1.11) | 0.94 (0.82 – 1.07) | 0.99 (0.87 – 1.14) | 0.91 |
| Sucrose                               |       | 0.99 (0.87 – 1.11) | 0.96 (0.85 – 1.09) | 1.96 (0.84 – 1.09) | 1.06 (0.93 – 1.21) | 0.36 |
| <b>Liver cancer<sup>9</sup></b>       | 222   |                    |                    |                    |                    |      |
| Total sugars                          |       | 1.08 (0.72 – 1.62) | 0.77 (0.49 – 1.23) | 0.91 (0.57 – 1.46) | 1.23 (0.75 – 2.03) | 0.53 |
| <i>Added sugars<sup>5</sup></i>       |       | 0.68 (0.44 – 1.06) | 0.78 (0.51 – 1.21) | 0.86 (0.56 – 1.32) | 1.06 (0.68 – 1.66) | 0.29 |
| Total fructose                        |       | 1.23 (0.81 – 1.86) | 1.05 (0.67 – 1.65) | 1.10 (0.69 – 1.76) | 1.53 (0.94 – 2.47) | 0.13 |
| Sucrose                               |       | 0.95 (0.63 – 1.44) | 0.77 (0.49 – 1.22) | 0.96 (0.62 – 1.49) | 1.14 (0.74 – 1.78) | 0.43 |
| <b>Pancreatic cancer<sup>10</sup></b> | 536   |                    |                    |                    |                    |      |
| Total sugars                          |       | 1.08 (0.83 – 1.40) | 0.98 (0.74 – 1.31) | 1.18 (0.88 – 1.59) | 0.98 (0.69 – 1.39) | 0.93 |
| <i>Added sugars<sup>5</sup></i>       |       | 0.86 (0.65 – 1.13) | 0.92 (0.70 – 1.21) | 0.84 (0.63 – 1.12) | 1.02 (0.75 – 1.38) | 0.75 |
| Total fructose                        |       | 0.95 (0.73 – 1.25) | 1.00 (0.76 – 1.32) | 1.14 (0.86 – 1.52) | 1.05 (0.76 – 1.46) | 0.51 |
| Sucrose                               |       | 0.72 (0.54 – 1.95) | 0.97 (0.75 – 1.27) | 0.90 (0.68 – 1.19) | 0.96 (0.71 – 1.29) | 0.76 |
| <b>Biliary cancer<sup>11</sup></b>    | 98    |                    |                    |                    |                    |      |
| Total sugars                          |       | 0.90 (0.54 – 1.49) | 0.82 (0.46 – 1.48) |                    |                    | 0.51 |

|                                     |       |                    |                    |                    |                    |      |
|-------------------------------------|-------|--------------------|--------------------|--------------------|--------------------|------|
| <i>Added sugars</i> <sup>5</sup>    |       | 1.38 (0.81 – 2.34) | 1.33 (0.75 – 2.35) |                    |                    | 0.45 |
| Total fructose                      |       | 0.93 (0.57 – 1.53) | 0.79 (0.44 – 1.39) |                    |                    | 0.40 |
| Sucrose                             |       | 1.29 (0.79 – 2.11) | 0.75 (0.42 – 1.32) |                    |                    | 0.22 |
| <b>Kidney cancer</b> <sup>1,2</sup> | 756   |                    |                    |                    |                    |      |
| Total sugars                        |       | 1.07 (0.86 – 1.35) | 1.01 (0.80 – 1.28) | 0.92 (0.72 – 1.17) | 1.05 (0.81 – 1.35) | 0.93 |
| <i>Added sugars</i> <sup>5</sup>    |       | 0.92 (0.73 – 1.15) | 0.88 (0.70 – 1.12) | 0.97 (0.76 – 1.23) | 0.86 (0.66 – 1.13) | 0.44 |
| Total fructose                      |       | 1.06 (0.85 – 1.34) | 1.08 (0.85 – 1.36) | 0.98 (0.76 – 1.26) | 1.03 (0.79 – 1.35) | 0.97 |
| Sucrose                             |       | 1.13 (0.89 – 1.43) | 1.09 (0.86 – 1.39) | 1.21 (0.94 – 1.54) | 1.11 (0.86 – 1.45) | 0.45 |
| <b>Non-Hodgkin</b>                  | 968   |                    |                    |                    |                    |      |
| <b>Lymphoma</b> <sup>6</sup>        |       |                    |                    |                    |                    |      |
| Total sugars                        |       | 1.03 (0.84 – 1.27) | 1.00 (0.81 – 1.24) | 1.09 (0.88 – 1.35) | 1.16 (0.94 – 1.45) | 0.12 |
| <i>Added sugars</i> <sup>5</sup>    |       | 0.98 (0.79 – 1.22) | 1.12 (0.91 – 1.38) | 1.17 (0.94 – 1.45) | 1.09 (0.87 – 1.37) | 0.32 |
| Total fructose                      |       | 1.26 (1.02 – 1.55) | 1.22 (0.99 – 1.52) | 1.14 (0.92 – 1.42) | 1.28 (1.03 – 1.60) | 0.12 |
| Sucrose                             |       | 0.98 (0.80 – 1.21) | 1.03 (0.83 – 1.27) | 0.99 (0.80 – 1.23) | 1.19 (0.96 – 1.47) | 0.07 |
| <b>Melanoma</b> <sup>6</sup>        | 1,117 |                    |                    |                    |                    |      |
| Total sugars                        |       | 1.12 (0.93 – 1.35) | 1.07 (0.88 – 1.29) | 0.98 (0.80 – 1.19) | 1.08 (0.88 – 1.33) | 0.92 |
| <i>Added sugars</i> <sup>5</sup>    |       | 1.08 (0.91 – 1.29) | 0.95 (0.79 – 1.15) | 0.98 (0.80 – 1.19) | 0.92 (0.75 – 1.15) | 0.27 |
| Total fructose                      |       | 1.10 (0.92 – 1.33) | 1.08 (0.89 – 1.30) | 0.93 (0.77 – 1.14) | 1.03 (0.84 – 1.26) | 0.67 |

|                                     |        |                    |                    |                    |                    |      |
|-------------------------------------|--------|--------------------|--------------------|--------------------|--------------------|------|
| Sucrose                             |        | 0.93 (0.77 – 1.12) | 1.10 (0.91 – 1.32) | 0.96 (0.79 – 1.16) | 0.97 (0.79 – 1.19) | 0.81 |
| <b>Thyroid cancer<sup>6</sup></b>   | 139    |                    |                    |                    |                    |      |
| Total sugars                        |        | 1.12 (0.65 – 1.94) | 1.19 (0.69 – 2.06) | 1.11 (0.63 – 1.96) | 1.27 (0.71 – 2.26) | 0.48 |
| <i>Added sugars<sup>5</sup></i>     |        | 1.13 (0.68 – 1.87) | 1.23 (0.74 – 2.05) | 0.89 (0.50 – 1.58) | 0.94 (0.51 – 1.75) | 0.57 |
| Total fructose                      |        | 1.11 (0.64 – 1.91) | 1.20 (0.70 – 2.06) | 0.87 (0.48 – 1.58) | 1.40 (0.80 – 2.43) | 0.36 |
| Sucrose                             |        | 1.26 (0.72 – 2.22) | 1.66 (0.96 – 2.87) | 1.47 (0.83 – 2.63) | 1.39 (0.76 – 2.56) | 0.33 |
| <b>Myeloma<sup>6</sup></b>          | 281    |                    |                    |                    |                    |      |
| Total sugars                        |        | 1.00 (0.69 – 1.46) | 0.96 (0.66 – 1.41) | 0.81 (0.54 – 1.22) | 0.89 (0.59 – 1.33) | 0.38 |
| <i>Added sugars<sup>5</sup></i>     |        | 0.85 (0.59 – 1.23) | 0.88 (0.61 – 1.28) | 0.79 (0.54 – 1.17) | 0.77 (0.51 – 1.17) | 0.27 |
| Total fructose                      |        | 0.81 (0.55 – 1.18) | 1.10 (0.77 – 1.58) | 0.69 (0.46 – 1.04) | 0.86 (0.58 – 1.27) | 0.38 |
| Sucrose                             |        | 0.91 (0.62 – 1.35) | 0.95 (0.64 – 1.39) | 1.08 (0.74 – 1.58) | 0.81 (0.54 – 1.22) | 0.49 |
| <b>Brain cancer<sup>6</sup></b>     | 307    |                    |                    |                    |                    |      |
| Total sugars                        |        | 1.10 (0.74 – 1.62) | 1.20 (0.82 – 1.77) | 1.33 (0.90 – 1.96) | 1.34 (0.90 – 1.99) | 0.10 |
| <i>Added sugars<sup>5</sup></i>     |        | 1.26 (0.89 – 1.78) | 0.96 (0.66 – 1.40) | 1.04 (0.71 – 1.53) | 1.13 (0.75 – 1.70) | 0.87 |
| Total fructose                      |        | 1.03 (0.69 – 1.52) | 1.23 (0.84 – 1.80) | 1.22 (0.83 – 1.79) | 1.28 (0.87 – 1.89) | 0.16 |
| Sucrose                             |        | 1.03 (0.72 – 1.49) | 0.84 (0.57 – 1.24) | 1.01 (0.70 – 1.47) | 1.13 (0.78 – 1.65) | 0.45 |
| <b>Prostate cancer<sup>13</sup></b> | 14,034 |                    |                    |                    |                    |      |
| Total sugars                        |        | 1.01 (0.96 – 1.07) | 1.02 (0.96 – 1.08) | 1.02 (0.96 – 1.08) | 0.99 (0.93 – 1.05) | 0.61 |

|                                  |                    |                    |                    |                    |      |
|----------------------------------|--------------------|--------------------|--------------------|--------------------|------|
| <i>Added sugars</i> <sup>5</sup> | 1.00 (0.95 – 1.06) | 1.01 (0.95 – 1.06) | 1.03 (0.97 – 1.09) | 0.99 (0.93 – 1.05) | 0.79 |
| Total fructose                   | 1.03 (0.97 – 1.08) | 1.01 (0.96 – 1.07) | 1.02 (0.97 – 1.08) | 0.99 (0.93 – 1.05) | 0.53 |
| Sucrose                          | 1.00 (0.95 – 1.05) | 0.99 (0.94 – 1.04) | 1.00 (0.95 – 1.06) | 1.01 (0.95 – 1.07) | 0.71 |

<sup>1</sup> Cox proportional hazards regression model adjusted for age, BMI (<18.5, ≥18.5 to <25, ≥25 to <30, ≥30 to <35, ≥35, or missing), family history of cancer, marital status, smoking (never smoker, quit ≥10 yrs ago, quit 5-9 yrs ago, quit 1-4 yrs ago, quit <1yr ago ≤20 cigs/d, quit <1yr ago >20 cigs/d, current ≤20 cigs/d, current 20-40 cigs/d, current >40 cigs/d, or missing), race (Caucasian, Black, Hispanic/Asian/Pacific Islander/American Indian/Alaskan native, or unknown), education (less than high school/unknown, high school graduate, some college, or college graduate), physical activity (never/rarely/missing, 1-3 times per month, 1-2 times per week, 3-4 times per week, or ≥5 times per week), energy intake (kcal, continuous) and alcohol intake (grams, quintiles).

<sup>2</sup> Findings for the remaining cancer sites which were not reported in the main table.

<sup>3</sup> Medians by quintile of intake were: 33.8, 46.1, 55.7, 66.5 and 85.3 g/1000 kcal for total sugars; 2.2, 3.5, 5.0, 7.0 and 11.2 tsp/1000 kcal for *added sugars*; 12.8, 18.2, 22.7, 28.0 and 38.1 g/1000 kcal for total fructose; and 11.9, 17.0, 21.2, 26.3 and 35.5 g/1000 kcal for sucrose.

<sup>4</sup> Medians by tertile of intake were: 38.7, 55.7 and 76.9 g/1000 kcal for total sugars; 2.7, 5.0 and 9.2 tsp/1000 kcal for *added sugars*; 14.9, 22.7 and 33.5 g/1000 kcal for total fructose; and 13.9, 21.2 and 31.4 g/1000 kcal for sucrose.

<sup>5</sup> Additionally adjusted for fruit without juice (g/1000 kcal, quintiles) and for fruit juice (g/1000 kcal, quintiles) to separate the effect of fruit juice and whole fruits.

<sup>6</sup> Additionally adjusted for vegetables intake (g/1000 kcal, quintiles).

<sup>7</sup> Additionally adjusted for fiber (g/1000 kcal, quintiles) and total fat intake (g/1000 kcal, quintiles).

<sup>8</sup> Additionally adjusted for fiber, red meat (g/1000 kcal, quintiles), calcium (mg/1000 kcal, quintiles), supplemental calcium (mg/1000 kcal, quintiles) and height (cm, continuous).

<sup>9</sup> Additionally adjusted for vegetables, total fat and red meat intake.

<sup>10</sup> Additionally adjusted for vegetables, total fat, red meat and folate intake ( $\mu\text{g}/1000$  kcal, quintiles).

<sup>11</sup> Additionally adjusted for vegetables, total fat intake.

<sup>12</sup> Additionally adjusted for vegetables and protein intake ( $\text{g}/1000$  kcal, quintiles).

<sup>13</sup> Additionally adjusted for vegetables and calcium intake.

**Supporting information - Table 5.** Multivariable HR<sup>1</sup> and 95% CI across quintiles (Q)/tertiles (T) of total sugars, *added sugars*, total fructose and sucrose intake in 179,990 women in the NIH-AARP Diet and Health Study for certain cancer sites<sup>2</sup>

|                                            | N<br>cases | Multivariable HRs (95% CI) by quintiles <sup>3</sup> or tertiles <sup>4</sup> of intake |                    |                    |                    | <i>P</i> <sub>trend</sub> |
|--------------------------------------------|------------|-----------------------------------------------------------------------------------------|--------------------|--------------------|--------------------|---------------------------|
|                                            |            | Q2/T2                                                                                   | Q3/T3              | Q4                 | Q5                 |                           |
| <b>Laryngeal cancer<sup>6</sup></b>        | 59         |                                                                                         |                    |                    |                    |                           |
| Total sugars                               |            | 0.73 (0.38 – 1.41)                                                                      | 0.91 (0.47 – 1.75) |                    |                    | 0.74                      |
| <i>Added sugars<sup>5</sup></i>            |            | 0.79 (0.38 – 1.64)                                                                      | 1.20 (0.62 – 2.31) |                    |                    | 0.46                      |
| Total fructose                             |            | 0.67 (0.34 – 1.31)                                                                      | 0.86 (0.45 - 1.64) |                    |                    | 0.62                      |
| Sucrose                                    |            | 0.93 (0.47 – 1.85)                                                                      | 1.30 (0.69 – 2.45) |                    |                    | 0.40                      |
| <b>Stomach cancer<sup>6</sup></b>          | 113        |                                                                                         |                    |                    |                    |                           |
| Total sugars                               |            | 1.30 (0.73 – 2.33)                                                                      | 0.58 (0.28 – 1.17) | 1.14 (0.63 – 2.08) | 0.99 (0.53 – 1.85) | 0.87                      |
| <i>Added sugars<sup>5</sup></i>            |            | 0.82 (0.44 – 1.52)                                                                      | 0.92 (0.50 – 1.68) | 0.83 (0.45 – 1.55) | 0.96 (0.51 – 1.79) | 0.93                      |
| Total fructose                             |            | 0.90 (0.50 – 1.63)                                                                      | 0.90 (0.50 – 1.62) | 0.80 (0.43 – 1.46) | 0.85 (0.47 – 1.56) | 0.58                      |
| Sucrose                                    |            | 1.02 (0.56 – 1.85)                                                                      | 0.75 (0.40 – 1.43) | 0.96 (0.53 – 1.75) | 1.00 (0.55 – 1.83) | 0.94                      |
| <b>Small intestinal cancer<sup>7</sup></b> | 45         |                                                                                         |                    |                    |                    |                           |
| Total sugars                               |            | 1.49 (0.71 – 3.12)                                                                      | 1.80 (0.74 – 4.37) |                    |                    | 0.19                      |
| <i>Added sugars<sup>5</sup></i>            |            | 0.79 (0.38 – 1.67)                                                                      | 1.05 (0.48 – 2.27) |                    |                    | 0.82                      |
| Total fructose                             |            | 1.84 (0.87 – 3.89)                                                                      | 2.17 (0.92 – 5.11) |                    |                    | 0.08                      |

|                                       |       |                    |                    |                    |                    |      |
|---------------------------------------|-------|--------------------|--------------------|--------------------|--------------------|------|
| Sucrose                               |       | 1.09 (0.50 – 2.35) | 1.75 (0.82 – 3.78) |                    |                    | 0.14 |
| <b>Colorectal cancer<sup>8</sup></b>  | 1,296 |                    |                    |                    |                    |      |
| Total sugars                          |       | 0.93 (0.78 – 1.11) | 1.02 (0.85 – 1.22) | 1.02 (0.84 – 1.22) | 1.06 (0.87- 1.29)  | 0.38 |
| <i>Added sugars<sup>5</sup></i>       |       | 1.03 (0.87 – 1.22) | 0.91 (0.76 – 1.09) | 0.99 (0.83 – 1.18) | 0.99 (0.81 – 1.19) | 0.87 |
| Total fructose                        |       | 0.86 (0.72 – 1.03) | 1.03 (0.86 – 1.23) | 1.07 (0.90 – 1.28) | 1.05 (0.87 – 1.27) | 0.20 |
| Sucrose                               |       | 0.95 (0.79 – 1.13) | 0.97 (0.81 – 1.16) | 1.05 (0.87 – 1.25) | 1.11 (0.92 – 1.33) | 0.13 |
| <b>Liver cancer<sup>9</sup></b>       | 66    |                    |                    |                    |                    |      |
| Total sugars                          |       | 0.79 (0.42 – 1.49) | 0.78 (0.38 - 1.62) |                    |                    | 0.53 |
| <i>Added sugars<sup>5</sup></i>       |       | 0.86 (0.47 – 1.56) | 0.75 (0.39 – 1.45) |                    |                    | 0.41 |
| Total fructose                        |       | 0.92 (0.51 – 1.65) | 0.50 (0.24 – 1.03) |                    |                    | 0.05 |
| Sucrose                               |       | 0.77 (0.43 – 1.39) | 0.54 (0.27 – 1.04) |                    |                    | 0.07 |
| <b>Pancreatic cancer<sup>10</sup></b> | 325   |                    |                    |                    |                    |      |
| Total sugars                          |       | 1.22 (0.85 – 1.75) | 1.22 (0.84 – 1.79) | 1.19 (0.80 – 1.79) | 1.05 (0.66 – 1.67) | 0.96 |
| <i>Added sugars<sup>5</sup></i>       |       | 0.99 (0.70 – 1.38) | 1.02 (0.73 – 1.44) | 0.81 (0.56 – 1.17) | 0.71 (0.47 – 1.08) | 0.05 |
| Total fructose                        |       | 1.22 (0.86 – 1.73) | 1.06 (0.73 – 1.54) | 1.22 (0.84 – 1.79) | 0.93 (0.60 – 1.44) | 0.65 |
| Sucrose                               |       | 1.18 (0.83 – 1.68) | 1.10 (0.76 – 1.58) | 1.27 (0.88 – 1.83) | 0.85 (0.56 – 1.28) | 0.37 |
| <b>Biliary cancer<sup>11</sup></b>    | 66    |                    |                    |                    |                    |      |
| Total sugars                          |       | 0.92 (0.50 – 1.67) | 0.80 (0.39 – 1.67) |                    |                    | 0.56 |



|                                     |     |                    |                    |                    |                    |      |
|-------------------------------------|-----|--------------------|--------------------|--------------------|--------------------|------|
| <i>Added sugars</i> <sup>5</sup>    |     | 1.20 (0.65 – 2.23) | 1.19 (0.61 – 2.33) |                    |                    | 0.79 |
| Total fructose                      |     | 1.05 (0.58 – 1.89) | 0.75 (0.36 – 1.53) |                    |                    | 0.41 |
| Sucrose                             |     | 0.71 (0.38 – 1.33) | 0.91 (0.48 – 1.71) |                    |                    | 0.83 |
| <b>Kidney cancer</b> <sup>1,2</sup> | 288 |                    |                    |                    |                    |      |
| Total sugars                        |     | 1.24 (0.87 – 1.78) | 1.04 (0.71 – 1.52) | 1.16 (0.79 – 1.69) | 1.00 (0.66 – 1.51) | 0.85 |
| <i>Added sugars</i> <sup>5</sup>    |     | 0.73 (0.51 – 1.06) | 0.74 (0.51 – 1.07) | 0.95 (0.66 – 1.37) | 0.78 (0.51 – 1.20) | 0.68 |
| Total fructose                      |     | 1.00 (0.70 – 1.42) | 0.88 (0.61 – 1.28) | 1.14 (0.79 – 1.65) | 0.84 (0.54 – 1.29) | 0.64 |
| Sucrose                             |     | 0.81 (0.56 – 1.16) | 0.90 (0.63 – 1.29) | 0.91 (0.63 – 1.32) | 0.90 (0.61 – 1.34) | 0.84 |
| <b>Non-Hodgkins</b>                 | 541 |                    |                    |                    |                    |      |
| <b>Lymphoma</b> <sup>6</sup>        |     |                    |                    |                    |                    |      |
| Total sugars                        |     | 1.14 (0.86 – 1.52) | 1.16 (0.87 – 1.55) | 1.48 (1.12 – 1.95) | 1.19 (0.88 – 1.60) | 0.11 |
| <i>Added sugars</i> <sup>5</sup>    |     | 1.24 (0.94 – 1.63) | 1.10 (0.82 – 1.47) | 1.33 (1.00 – 1.77) | 1.16 (0.85 – 1.58) | 0.49 |
| Total fructose                      |     | 1.11 (0.84 – 1.48) | 1.17 (0.88 – 1.55) | 1.31 (0.99 – 1.73) | 1.21 (0.91 – 1.62) | 0.14 |
| Sucrose                             |     | 1.07 (0.80 – 1.44) | 1.37 (1.04 – 1.82) | 1.33 (1.00 -1.77)  | 1.31 (0.98 – 1.75) | 0.05 |
| <b>Melanoma</b> <sup>6</sup>        | 438 |                    |                    |                    |                    |      |
| Total sugars                        |     | 0.89 (0.67 – 1.19) | 0.79 (0.58 – 1.06) | 0.91 (0.68 – 1.22) | 0.88 (0.64 – 1.20) | 0.52 |
| <i>Added sugars</i> <sup>5</sup>    |     | 0.87 (0.64 – 1.17) | 0.97 (0.72 – 1.30) | 0.91 (0.67 – 1.24) | 0.95 (0.69 – 1.33) | 0.97 |
| Total fructose                      |     | 1.04 (0.78 – 1.39) | 0.90 (0.67 – 1.23) | 1.05 (0.78 – 1.42) | 0.95 (0.69 – 1.30) | 0.77 |

|                                    |       |                    |                    |                    |                    |      |
|------------------------------------|-------|--------------------|--------------------|--------------------|--------------------|------|
| Sucrose                            |       | 1.01 (0.76 – 1.34) | 0.94 (0.70 – 1.26) | 0.80 (0.58 – 1.09) | 0.95 (0.70 – 1.29) | 0.45 |
| <b>Thyroid cancer<sup>6</sup></b>  | 152   |                    |                    |                    |                    |      |
| Total sugars                       |       | 0.69 (0.39 – 1.22) | 1.10 (0.66 – 1.82) | 1.10 (0.66 – 1.83) | 0.98 (0.58 – 1.67) | 0.61 |
| <i>Added sugars<sup>5</sup></i>    |       | 0.84 (0.51 – 1.39) | 0.58 (0.33 – 1.02) | 0.87 (0.53 – 1.46) | 0.87 (0.51 – 1.48) | 0.98 |
| Total fructose                     |       | 0.70 (0.41 – 1.20) | 0.83 (0.50 – 1.39) | 1.13 (0.70 – 1.83) | 0.82 (0.49 – 1.38) | 0.98 |
| Sucrose                            |       | 0.69 (0.40 – 1.18) | 0.96 (0.58 – 1.57) | 0.96 (0.58 – 1.57) | 0.78 (0.46 – 1.32) | 0.66 |
| <b>Myeloma<sup>6</sup></b>         | 141   |                    |                    |                    |                    |      |
| Total sugars                       |       | 1.48 (0.86 – 2.53) | 1.41 (0.82 – 2.44) | 0.94 (0.51 – 1.71) | 1.24 (0.69 – 2.22) | 0.97 |
| <i>Added sugars<sup>5</sup></i>    |       | 0.88 (0.51 – 1.49) | 1.20 (0.73 – 1.99) | 0.87 (0.50 – 1.51) | 0.81 (0.44 – 1.46) | 0.43 |
| Total fructose                     |       | 0.96 (0.55 – 1.65) | 1.05 (0.61 – 1.80) | 1.01 (0.58 – 1.75) | 1.12 (0.65 – 1.94) | 0.63 |
| Sucrose                            |       | 0.97 (0.57 – 1.67) | 1.02 (0.60 – 1.75) | 1.06 (0.62 – 1.82) | 1.02 (0.59 – 1.79) | 0.85 |
| <b>Brain cancer<sup>6</sup></b>    | 124   |                    |                    |                    |                    |      |
| Total sugars                       |       | 0.89 (0.53 – 1.48) | 0.65 (0.37 – 1.15) | 0.67 (0.38 – 1.19) | 0.86 (0.49 – 1.51) | 0.44 |
| <i>Added sugars<sup>5</sup></i>    |       | 0.74 (0.42 – 1.29) | 0.89 (0.52 – 1.53) | 0.94 (0.55 – 1.64) | 0.70 (0.37 – 1.31) | 0.45 |
| Total fructose                     |       | 0.91 (0.54 – 1.53) | 0.76 (0.44 – 1.32) | 0.68 (0.38 – 1.21) | 0.79 (0.45 – 1.41) | 0.31 |
| Sucrose                            |       | 0.90 (0.53 – 1.51) | 0.81 (0.47 – 1.40) | 0.77 (0.44 – 1.35) | 0.73 (0.40 – 1.31) | 0.25 |
| <b>Female cancers<sup>13</sup></b> | 6,361 |                    |                    |                    |                    |      |
| Total sugars                       |       | 1.06 (0.98 – 1.15) | 1.00 (0.92 – 1.09) | 1.00 (0.91 – 1.09) | 0.97 (0.88 – 1.07) | 0.30 |

|                                        |       |                    |                    |                    |                    |      |
|----------------------------------------|-------|--------------------|--------------------|--------------------|--------------------|------|
| <i>Added sugars</i> <sup>5</sup>       |       | 1.02 (0.94 – 1.10) | 1.01 (0.93 – 1.09) | 1.01 (0.93 – 1.10) | 1.01 (0.92 – 1.10) | 0.99 |
| Total fructose                         |       | 1.03 (0.95 – 1.11) | 1.01 (0.93 – 1.10) | 1.00 (0.92 – 1.09) | 0.95 (0.87 – 1.05) | 0.21 |
| Sucrose                                |       | 1.07 (0.99 – 1.16) | 0.97 (0.89 – 1.08) | 0.99 (0.91 – 1.08) | 1.01 (0.93 – 1.11) | 0.73 |
| <b>Breast cancer</b> <sup>13</sup>     | 4,793 |                    |                    |                    |                    |      |
| Total sugars                           |       | 1.07 (0.97 – 1.17) | 0.98 (0.89 – 1.08) | 0.94 (0.85 – 1.05) | 0.96 (0.85 – 1.08) | 0.15 |
| <i>Added sugars</i> <sup>5</sup>       |       | 1.03 (0.94 – 1.13) | 1.01 (0.92 – 1.11) | 1.01 (0.92 – 1.12) | 1.01 (0.91 – 1.12) | 0.93 |
| Total fructose                         |       | 1.03 (0.94 – 1.13) | 0.97 (0.88 – 1.07) | 0.96 (0.87 – 1.06) | 0.93 (0.84 – 1.04) | 0.10 |
| Sucrose                                |       | 1.05 (0.96 – 1.15) | 0.93 (0.84 – 1.02) | 0.95 (0.86 – 1.05) | 1.02 (0.93 – 1.13) | 0.97 |
| <b>Endometrial cancer</b> <sup>6</sup> | 924   |                    |                    |                    |                    |      |
| Total sugars                           |       | 1.14 (0.92 – 1.42) | 1.27 (1.02 – 1.58) | 1.28 (1.03 – 1.60) | 1.18 (0.94 – 1.50) | 0.13 |
| <i>Added sugars</i> <sup>5</sup>       |       | 0.94 (0.75 – 1.16) | 1.08 (0.88 – 1.34) | 1.03 (0.83 – 1.29) | 1.09 (0.86 -1.37)  | 0.35 |
| Total fructose                         |       | 1.10 (0.89 – 1.38) | 1.25 (1.00 – 1.55) | 1.25 (1.00 – 1.56) | 1.23 (0.98 – 1.55) | 0.06 |
| Sucrose                                |       | 1.24 (1.00 – 1.54) | 1.26 (1.01 – 1.57) | 1.24 (0.99 – 1.54) | 1.12 (0.88 – 1.41) | 0.63 |
| <b>Cervical cancer</b> <sup>6</sup>    | 92    |                    |                    |                    |                    |      |
| Total sugars                           |       | 0.96 (0.56 – 1.64) | 1.02 (0.60 – 1.75) |                    |                    | 0.93 |
| <i>Added sugars</i> <sup>5</sup>       |       | 1.44 (0.81 – 2.54) | 1.69 (0.94 – 3.02) |                    |                    | 0.10 |
| Total fructose                         |       | 1.06 (0.63 – 1.79) | 0.88 (0.51 – 1.52) |                    |                    | 0.61 |
| Sucrose                                |       | 0.98 (0.57 – 1.70) | 1.24 (0.73 – 2.12) |                    |                    | 0.38 |

<sup>1</sup> Cox proportional hazards regression model adjusted for age, BMI (<18.5, ≥18.5 to <25, ≥25 to <30, ≥30 to <35, ≥35, or missing), family history of cancer, marital status, smoking (never smoker, quit ≥10 yrs ago, quit 5-9 yrs ago, quit 1-4 yrs ago, quit <1yr ago ≤20 cigs/d, quit <1yr ago >20 cigs/d, current ≤20 cigs/d, current 20-40 cigs/d, current >40 cigs/d, or missing), race (Caucasian, Black, Hispanic/Asian/Pacific Islander/American Indian/Alaskan native, or unknown), education (less than high school/unknown, high school graduate, some college, or college graduate), physical activity (never/rarely/missing, 1-3 times per month, 1-2 times per week, 3-4 times per week, or ≥5 times per week), energy intake (kcal, continuous) and alcohol intake (grams, quintiles).

<sup>2</sup> Findings for the remaining cancer sites which were not reported in the main table.

<sup>3</sup> Medians by quintile of intake were: 38.7, 51.6, 61.5, 72.5 and 91.5 g/1000 kcal for total sugars; 2.4, 3.7, 5.0, 6.9 and 11.0 tsp/1000 kcal for *added sugars*; 14.8, 20.5, 25.0, 30.4 and 40.6 g/1000 kcal for Total fructose; and 13.6, 18.7, 22.9, 28.0 and 37.5 g/1000 kcal for sucrose.

<sup>4</sup> Medians by tertile of intake were: 43.9, 61.4 and 83.1 g/1000 kcal for total sugars; 2.9, 5.0 and 9.0 tsp/1000 kcal for *added sugars*; 17.0, 25.0 and 35.9 g/1000 kcal for total fructose; and 15.6, 22.9 and 33.2 g/1000 kcal for sucrose.

<sup>5</sup> Additionally adjusted for fruit without juice (g/1000 kcal, quintiles) and for fruit juice (g/1000 kcal, quintiles) to separate the effect of fruit juice and whole fruits.

<sup>6</sup> Additionally adjusted for vegetables intake (g/1000 kcal, quintiles).

<sup>7</sup> Additionally adjusted for fiber (g/1000 kcal, quintiles) and total fat intake (g/1000 kcal, quintiles).

<sup>8</sup> Additionally adjusted for fiber, red meat (g/1000 kcal, quintiles), calcium (mg/1000 kcal, quintiles), supplemental calcium (mg, quintiles) and height (cm, continuous).

<sup>9</sup> Additionally adjusted for vegetables, total fat and red meat intake.

<sup>10</sup> Additionally adjusted for vegetables, total fat, red meat and folate intake (μg/1000 kcal, quintiles).

<sup>11</sup> Additionally adjusted for vegetables and total fat intake.

<sup>12</sup> Additionally adjusted for vegetables and protein intake (g/1000 kcal, quintiles).

<sup>13</sup> Additionally adjusted for vegetables and total fat intake.
